# Supplementary material for: One-dimensional water channels in lanthanum sulfate: a first-principles study
Source: Royal Society of Chemistry journal article supplement (doi:10.1039/c7ta05714h), 2017-01-01
Supplement: c7ta05714h1.pdf [file c7ta05714h1.pdf]

## Supplementary Information

### One-Dimensional Water Channels in Lanthanum Sulfate: A First-Principles Study

Kazuaki Toyoura,\* Hirotaka Tai, Naoyuki Hatada, Kunihiko Shizume, and Tetsuya Uda

*Department of Materials Science and Engineering, Kyoto University,*

*Yoshida, Sakyo, Kyoto 606-8501, Japan.*

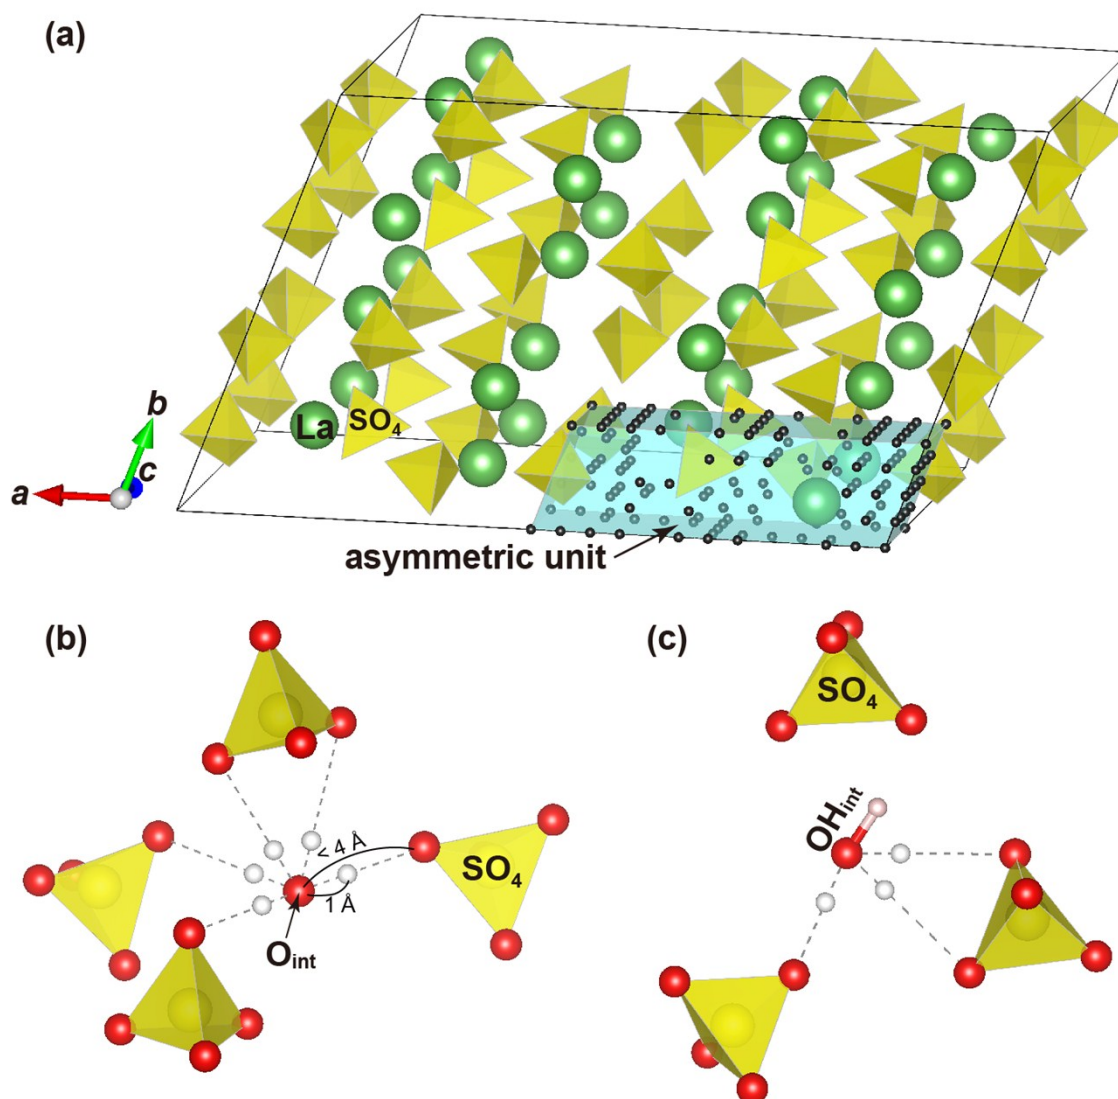

Figure S1. Three-step procedure (steps 1–3) for determining the H<sub>2</sub>O stable structure in La<sub>2</sub>(SO<sub>4</sub>)<sub>3</sub>. (a) 144 grid points (black spheres) on the 12×4×4 grid in the asymmetric unit used as the initial positions of an interstitial O ion for structural optimization at step 1. The grid points are shown in the supercell consisting of 1×2×2 unit cells. 48 grid points close to the neighboring host ion are excluded. (b) Initial proton positions (white spheres) around an interstitial O ion (O<sub>int</sub>) for structural optimization at step 2, to determine the stable structure of an OH ion. These initial positions are on a sphere around the interstitial O ion with a radius of 1 Å and on a line connecting the interstitial and a neighboring O ions. The distance between the two O ions are shorter than 4 Å. (c) Initial proton positions (white spheres) around an interstitial OH ion (OH<sub>int</sub>) for structural optimization at step 3, to determine the H<sub>2</sub>O stable structure. These positions are determined in the same manner at step 2.
